# Supplementary material for: A lactate metabolism-related gene signature to diagnose osteoarthritis based on machine learning combined with experimental validation
Source: publisher site journal article supplement (doi:10.18632/aging.205873), 2024-10-16
Supplement: Supplementary file [file aging-v16i20-205873-supplementary-material-SD2.pdf]

## SUPPLEMENTARY TABLES

**Supplementary Table 1. 273 lactate metabolism-related genes collected from the MSigDB.**

| Gene symbol                                                                                                                                                                                                                                                                                                                                                                                                                                                                                                                                                                                                                                                                                                                                                                                                                                                                                                                                                                                                                                                                                                                                                                                                                                                                                                                                                                                                                                                                                                                                                                                                                                                                                                                                                                                                                                                                                                                                                                                                                                    |
|------------------------------------------------------------------------------------------------------------------------------------------------------------------------------------------------------------------------------------------------------------------------------------------------------------------------------------------------------------------------------------------------------------------------------------------------------------------------------------------------------------------------------------------------------------------------------------------------------------------------------------------------------------------------------------------------------------------------------------------------------------------------------------------------------------------------------------------------------------------------------------------------------------------------------------------------------------------------------------------------------------------------------------------------------------------------------------------------------------------------------------------------------------------------------------------------------------------------------------------------------------------------------------------------------------------------------------------------------------------------------------------------------------------------------------------------------------------------------------------------------------------------------------------------------------------------------------------------------------------------------------------------------------------------------------------------------------------------------------------------------------------------------------------------------------------------------------------------------------------------------------------------------------------------------------------------------------------------------------------------------------------------------------------------|
| HMOX1, NGLY1, CLPB, NDUFB9, FKTN, MLIP, HIBCH, PDPI, SLC2A1, POMT1, SLC4A1, CYC1, COQ2, SLC16A8, CFI, SLC25A19, LDHB, RHAG, ALDOA, C1QBP, GATA1, SLC25A12, MRPL12, XK, NDUFB8, LDHA, NDUFAF3, TIMM50, NDUFV2, TUFM, EMB, COX8A, MYC, PYGL, MDH2, HTRA2, CYP27A1, HAGH, PLEC, GATA2, HSD17B10, PDSS1, SCO1, NDUFS2, CHCHD10, MTHFD1, MRPS22, GYS2, UQCRH, KLF1, SDHB, DGUOK, ISCA1, NDUFS1, AIFM1, RPS14, NDUFS6, HBB, PUS1, RNASEH1, COX5A, SUCLG1, JAK2, NDUFA6, ADAMTS13, NDUFA2, PIGA, PDHX, STAT2, SLC19A1, RHD, PNPLA8, IRAK1, MRPS7, UQCRC2, HPDL, ABCG8, COX6B1, COX4I1, POMT2, SOD1, NDUFAF2, NDUFA13, SFXN4, LIAS, LETM1, ZNFX1, LONP1, SLC25A10, SLC25A3, NDUFAF4, MRPS34, ACAT2, MRPS2, SLC5A8, COX10, ECHS1, PMPCB, PNPLA2, SLC16A1, ACAT1, PNPT1, NDUFB11, ATAD3A, RHCE, COQ4, NUBPL, PER2, FLI1, MRPL3, TRMT5, LRPPRC, SPP1, CAV3, RRM2B, SDHA, COX15, POMGNT1, DNMI1, NDUFS3, EARS2, MRPS28, LYST, INPP5K, WARS2, TK2, PNPO, NARS2, FASTKD2, YARS2, NDUFS8, SLC25A4, KY, GAA, NDUFA12, NDUFA1, MIPEP, GOT2, CA5A, ACAD9, ALDH4A1, NDUFB3, MPV17, PITRM1, NDUFS7, SLC16A7, AGK, UQCRCQ, AARS2, PDHA1, TET2, DLD, SLC13A3, CDAN1, MVK, PHKG2, GTPBP3, PARK7, BCS1L, PLA2G6, LIPT2, FBXL4, OGDH, LYRM4, LIPT1, TRMU, PIK3CG, KIF23, NDUFA8, TXN2, SLC7A7, TSFM, POLRMT, NDUFB7, NFS1, KCNN4, VARS2, CALR, SLC16A3, COX6A2, FARS2, TCIRG1, NDUFA11, SIL1, NDUFB10, LYRM7, SLC19A3, OCRL, STAT4, CD46, LIPA, ATPAF2, DARS2, MPL, POLG2, TTC26, NDUFAF1, NSUN2, GFM2, PDSS2, GFM1, UQCRB, LPIN1, SURF1, COX16, MTO1, SYNJ1, PPCS, HLA-DRB1, SLC25A42, ACTN3, AKR1D1, CHEK2, VPS13A, PC, COL4A1, NDUFC2, MRPS14, SLC25A26, B3GALNT2, NDUFA4, HIF1A, TP53, DTYMK, CPT2, FKR, RARS2, LDHC, FOXRED1, DAG1, RMND1, HMGCL, TMEM126B, COQ9, PIEZO1, TACO1, MECR, TIMMDC1, DNAJC19, NDUFA10, ISCU, SLC39A8, MECP2, TIMM22, HS6ST2, NSUN3, TPK1, HMGCS2, NDUFS4, CFH, ACADM, MTFMT, MRPS16, ALDH6A1, LDHAL6B, LDHD, SCO2, COG8, NFU1, SLC25A13, CARS2, TARS2, PNKD, NDUFV1, UPB1, LDHAL6A, SERAC1, RB1, POLG, NDUFA9, MRPL44, PFKFB2, SLC5A12. |

**Supplementary Table 2. The information of the datasets from the GEO.**

| ID        | Dataset type | Tissues          | Platform             | Experimental type                                  | Sample size (Control/OA) | PMID                 |
|-----------|--------------|------------------|----------------------|----------------------------------------------------|--------------------------|----------------------|
| GSE51588  | Training     | Cartilage tissue | GPL13497             | Expression profiling by array                      | 10/40                    | 24229462             |
| GSE114007 | Validation   | Cartilage tissue | GPL11154<br>GPL18573 | Expression profiling by high throughput sequencing | 18/20                    | 30081074             |
| GSE117999 | Validation   | Cartilage tissue | GPL20844             | Expression profiling by array                      | 12/12                    | NA                   |
| GSE82107  | Validation   | Synovial tissue  | GPL570               | Expression profiling by array                      | 7/10                     | 27870898             |
| GSE89408  | -            | Synovial tissue  | GPL11154             | Expression profiling by high throughput sequencing | OA: 22<br>RA: 152        | 28455435<br>28863153 |

**Supplementary Table 3. The baseline clinicopathological features of the control and OA subjects in the local cohort.**

| Feature                 | Control (N = 12) | OA (N = 12) |
|-------------------------|------------------|-------------|
| Age                     | 54.17 ± 7.8      | 60.08 ± 8.1 |
| Sex                     |                  |             |
| Male                    | 8 (66.67%)       | 6 (50.00%)  |
| Female                  | 4 (33.33%)       | 6 (50.00%)  |
| BMI                     | 29.17 ± 7.5      | 32.08 ± 9.4 |
| Kellgren-Lawrence Grade |                  |             |
| I                       | -                | 0 (0.00%)   |
| II                      | -                | 0 (0.00%)   |
| III                     | -                | 3 (25.00%)  |
| IV                      | -                | 9 (75.00%)  |

**Supplementary Table 4. The siRNA sequences used in this study.**

| ID          | Sequence (5'-3')      |
|-------------|-----------------------|
| si-NDUFB9-1 | GTCCCAGAATGGTGCTTAGAT |
| si-NC-1     | GCGTGTCCAATTCGAGTAGAT |
| si-NDUFB9-2 | GGCAATGTATCCTGATTACTT |
| si-NC-2     | GACTTACTCGGCGTTATAATT |

**Supplementary Table 5. The primer sequence of the qPCR experiments.**

| Gene   | Sequence (5'-3')                                                                 |
|--------|----------------------------------------------------------------------------------|
| SLC2A1 | Forward Primer: GGCCAAGAGTGTGCTAAAGAA<br>Reverse Primer: ACAGCGTTGATGCCAGACAG    |
| NDUFB9 | Forward Primer: GTGGTGCCTCCAGAGAGAC<br>Reverse Primer: GGCCTTCGCCATATCCTTTTC     |
| GAPDH  | Forward Primer: GGAGCGAGATCCCTCCAAAAT<br>Reverse Primer: GGCTGTTGTCATACTTCTCATGG |
