# Supplementary material for: A lactate metabolism-related gene signature to diagnose osteoarthritis based on machine learning combined with experimental validation
Source: publisher site journal article supplement (doi:10.18632/aging.205873), 2024-10-16
Supplement: Supplementary file [file aging-v16i20-205873-supplementary-material-SD4.pdf]

**Supplementary Table 7. The coefficients of the genes in the LASSO regression model.**

| Gene    | Coefficients |
|---------|--------------|
| XK      | -0.466813114 |
| GATA1   | -0.297177278 |
| HMOX1   | -1.044903664 |
| SLC2A1  | -0.306222582 |
| CYC1    | -0.009444988 |
| HAGH    | -0.09719996  |
| NDUFB9  | -3.705789774 |
| HTRA2   | -0.00717518  |
| ISCA1   | -0.870643408 |
| HIBCH   | 0.211640847  |
| FKTN    | 0.211721146  |
| PDP1    | 3.359955862  |
| SLC16A8 | 0.103277647  |

**Supplementary Table 8. The genes identified by the SVM-RFE algorithm.**

| Gene                                                                                    |
|-----------------------------------------------------------------------------------------|
| NDUFB9, CYC1, HMOX1, PYGL, CFI, FKTN, MLIP, SLC2A1, CYP27A1, CLPB, NDUFS2, RHAG, HIBCH. |

**Supplementary Table 9. The results obtained from the Boruta algorithm.**

| Gene   | Status    |
|--------|-----------|
| RHAG   | Confirmed |
| XK     | Confirmed |
| GATA1  | Confirmed |
| SLC4A1 | Confirmed |
| RHCE   | Confirmed |
| KLF1   | Confirmed |
| RHD    | Confirmed |
| HMOX1  | Confirmed |
| LDHA   | Confirmed |
| EMB    | Confirmed |
| SLC2A1 | Confirmed |
| PYGL   | Confirmed |
| CLPB   | Confirmed |
| CYC1   | Confirmed |
| C1QBP  | Confirmed |
| HAGH   | Confirmed |
| MYC    | Confirmed |
| LDHB   | Confirmed |
| NDUFB9 | Confirmed |
| NDUFS2 | Confirmed |
| MRPL12 | Confirmed |
| ALDOA  | Confirmed |

|          |           |
|----------|-----------|
| COX8A    | Confirmed |
| COQ2     | Confirmed |
| NDUFV2   | Confirmed |
| HTRA2    | Confirmed |
| CHCHD10  | Confirmed |
| MDH2     | Confirmed |
| NDUFAF2  | Confirmed |
| NDUFAF3  | Confirmed |
| TUFM     | Confirmed |
| TIMM50   | Confirmed |
| PDHX     | Confirmed |
| MTHFD1   | Confirmed |
| SLC25A12 | Confirmed |
| CYP27A1  | Confirmed |
| ADAMTS13 | Confirmed |
| POMT1    | Confirmed |
| HIBCH    | Confirmed |
| FKTN     | Confirmed |
| PDP1     | Confirmed |
| CFI      | Confirmed |
| MLIP     | Confirmed |
| SLC16A8  | Confirmed |
| PNPLA2   | Rejected  |
| HSD17B10 | Rejected  |
| JAK2     | Rejected  |
| SLC5A8   | Rejected  |
| LONP1    | Rejected  |
| MRPL3    | Rejected  |
| NDUFAF4  | Rejected  |
| PNPLA8   | Rejected  |
| SUCLG1   | Rejected  |
| CAV3     | Rejected  |
| PER2     | Rejected  |
| SPP1     | Rejected  |
| ABCG8    | Rejected  |
| GYS2     | Tentative |
| HBB      | Tentative |
| SDHB     | Tentative |
| UQCRH    | Tentative |
| NDUFA6   | Tentative |
| COX5A    | Tentative |
| PUS1     | Tentative |
| RNASEH1  | Tentative |
| MRPS7    | Tentative |
| SLC16A1  | Tentative |
| COX10    | Tentative |
| HPDL     | Tentative |
| ISCA1    | Tentative |
| PIGA     | Tentative |
| COX4I1   | Tentative |
| PLEC     | Tentative |
| GATA2    | Tentative |

**Supplementary Table 10. The univariate logistic regression of the differentially-expressed genes associated with lactate metabolism.**

| Gene     | OR (95%CI)                   | P-value |
|----------|------------------------------|---------|
| SLC2A1   | 0.037 (0.004-0.173)          | <0.001  |
| SLC25A12 | 143.349 (11.744-4357.33)     | 0.001   |
| HIBCH    | 1172.193 (41.919-208455.093) | 0.001   |
| LDHB     | 0.021 (0.001-0.140)          | 0.001   |
| COQ2     | 0.003 (0.001-0.054)          | 0.001   |
| TIMM50   | 0.002 (0.001-0.047)          | 0.001   |
| COX8A    | 0.009 (0.001-0.099)          | 0.001   |
| MTHFD1   | 0.004 (0.001-0.068)          | 0.001   |
| SLC16A8  | 20.916 (4.512-199.328)       | 0.001   |
| C1QBP    | 0.021 (0.001-0.145)          | 0.001   |
| MDH2     | 0.001 (0.001-0.037)          | 0.001   |
| MRPL12   | 0.017 (0.001-0.135)          | 0.001   |
| MYC      | 0.038 (0.003-0.207)          | 0.002   |
| PLEC     | 37.541 (5.505-573.250)       | 0.002   |
| NDUFA6   | 0.010 (0.001-0.113)          | 0.002   |
| CYP27A1  | 258.300 (14.192-19613.825)   | 0.002   |
| ISCA1    | 0.005 (0.001-0.089)          | 0.002   |
| NDUFV2   | 0.003 (0.001-0.064)          | 0.002   |
| TUFM     | 0.001 (0.001-0.021)          | 0.002   |
| NDUFAF3  | 0.001 (0.001-0.012)          | 0.002   |
| SUCLG1   | 0.013 (0.001-0.147)          | 0.002   |
| RHAG     | 0.535 (0.324-0.747)          | 0.002   |
| HBB      | 0.241 (0.081-0.538)          | 0.002   |
| GATA2    | 10.556 (2.938-69.825)        | 0.002   |
| CHCHD10  | 0.025 (0.001-0.190)          | 0.002   |
| GYS2     | 0.226 (0.073-0.523)          | 0.003   |
| PDHX     | 0.053 (0.006-0.304)          | 0.003   |
| XK       | 0.450 (0.236-0.697)          | 0.003   |
| EMB      | 0.190 (0.051-0.477)          | 0.003   |
| ADAMTS13 | 42.235 (5.112-805.013)       | 0.003   |
| HAGH     | 0.106 (0.017-0.375)          | 0.003   |
| ALDOA    | 0.003 (0.001-0.063)          | 0.003   |
| NDUFS2   | 0.001 (0.001-0.014)          | 0.003   |
| UQCRH    | 0.018 (0.001-0.166)          | 0.003   |
| NDUFB9   | 0.001 (0.001-0.004)          | 0.003   |
| SLC4A1   | 0.293 (0.105-0.565)          | 0.003   |
| LDHA     | 0.142 (0.028-0.406)          | 0.003   |
| HPDL     | 0.018 (0.001-0.184)          | 0.003   |
| SDHB     | 0.013 (0.001-0.135)          | 0.003   |
| RNASEH1  | 0.005 (0.001-0.098)          | 0.004   |
| MLIP     | 345.260 (17.277-80337.860)   | 0.004   |
| CLPB     | 0.001 (0.001-0.039)          | 0.004   |
| GATA1    | 0.435 (0.214-0.689)          | 0.004   |
| PUS1     | 0.039 (0.003-0.252)          | 0.004   |
| PYGL     | 0.009 (0.001-0.116)          | 0.004   |
| COX4I1   | 0.021 (0.001-0.206)          | 0.004   |

|          |                                       |       |
|----------|---------------------------------------|-------|
| MRPS7    | 0.002 (0.001-0.063)                   | 0.004 |
| HSD17B10 | 0.029 (0.001-0.209)                   | 0.004 |
| COX10    | 0.003 (0.001-0.090)                   | 0.004 |
| PIGA     | 0.050 (0.004-0.311)                   | 0.005 |
| HTRA2    | 0.001 (0.001-0.009)                   | 0.005 |
| PDP1     | 181.034 (10.849-17070.709)            | 0.005 |
| COX5A    | 0.020 (0.001-0.188)                   | 0.005 |
| KLF1     | 0.451 (0.224-0.728)                   | 0.005 |
| JAK2     | 0.069 (0.007-0.348)                   | 0.006 |
| NDUFAF4  | 0.113 (0.020-0.481)                   | 0.006 |
| PNPLA8   | 0.063 (0.005-0.353)                   | 0.006 |
| NDUFAF2  | 0.112 (0.017-0.464)                   | 0.007 |
| RHD      | 0.514 (0.279-0.791)                   | 0.008 |
| FKTN     | 119875.058 (245.767-44103618194.23)   | 0.009 |
| LONP1    | 0.051 (0.003-0.341)                   | 0.010 |
| ABCG8    | 10.071 (2.296-80.359)                 | 0.010 |
| SLC5A8   | 0.190 (0.045-0.611)                   | 0.010 |
| SLC16A1  | 0.126 (0.021-0.532)                   | 0.010 |
| MRPL3    | 0.146 (0.028-0.567)                   | 0.010 |
| SPP1     | 3.812 (1.445-12.166)                  | 0.012 |
| PER2     | 5.184 (1.569-22.371)                  | 0.012 |
| PNPLA2   | 0.147 (0.023-0.521)                   | 0.013 |
| RHCE     | 0.688 (0.492-0.913)                   | 0.014 |
| POMT1    | 15336.767 (60.167-493515289.745)      | 0.014 |
| CAV3     | 10.665 (2.035-102.238)                | 0.014 |
| HMOX1    | 0.001 (0.001-0.021)                   | 0.017 |
| CFI      | 708510.387 (272.556-4445894389564.95) | 0.017 |
| CYC1     | 0.001 (0.000-0.001)                   | 0.217 |

**Supplementary Table 11. The samples in the C1 and C2 clusters.**

| Cluster | Sample ID                                                                                                                                                                                                                                                                                                                                                                                                                                                                                                               |
|---------|-------------------------------------------------------------------------------------------------------------------------------------------------------------------------------------------------------------------------------------------------------------------------------------------------------------------------------------------------------------------------------------------------------------------------------------------------------------------------------------------------------------------------|
| C1      | GSM1248759, GSM1248760, GSM1248761, GSM1248762, GSM1248764, GSM1248765, GSM1248766, GSM1248767.                                                                                                                                                                                                                                                                                                                                                                                                                         |
| C2      | GSM1248763, GSM1248768, GSM1248769, GSM1248770, GSM1248771, GSM1248772, GSM1248773, GSM1248774, GSM1248775, GSM1248776, GSM1248777, GSM1248778, GSM1248779, GSM1248780, GSM1248781, GSM1248782, GSM1248783, GSM1248784, GSM1248785, GSM1248786, GSM1248787, GSM1248788, GSM1248789, GSM1248790, GSM1248791, GSM1248792, GSM1248793, GSM1248794, GSM1248795, GSM1248796, GSM1248797, GSM1248798, GSM1248799, GSM1248800, GSM1248801, GSM1248802, GSM1248803, GSM1248804, GSM1248805, GSM1248806, GSM1248807, GSM1248808. |
